# Supplementary material for: Immuno-regulatory malignant B cells contribute to Chronic Lymphocytic Leukemia progression
Source: PubMed Central journal article supplement (PMC10353928; doi:10.1038/s41417-023-00602-5), 2023-03-28
Supplement: 41417_2023_602_MOESM1_ESM.pdf [file 41417_2023_602_MOESM1_ESM.pdf]

1 **Supplementary Information**

2

3 **Immuno-regulatory malignant B cells contribute to Chronic Lymphocytic Leukemia**  
4 **progression**

5 Arsène Mékinian <sup>1,2</sup>, Anne Quinquenel <sup>§, 1,2</sup>, Koceïla Ait Belkacem <sup>§, 1,2</sup>, Ferial Kanoun <sup>1,2</sup>,  
6 Elisabetta Dondi <sup>1,2</sup>, Emilie Franck <sup>1,2</sup>, Marouane Boubaya <sup>3</sup>, Maïssa Mhibik <sup>1,2</sup>, Fanny Baran-  
7 Marszak <sup>1,2,4</sup>, Rémi Letestu <sup>1,2,4</sup>, Florence Ajchenbaum-Cymbalista <sup>1,2,4</sup>, Vincent Lévy <sup>3,5</sup>,  
8 Nadine Varin-Blank <sup>\* 1,2</sup> and Christine Le Roy <sup>\* 1,2</sup>.

9

10 <sup>1</sup> INSERM, U978, Bobigny, France

11 <sup>2</sup> Université Paris 13 dite « Sorbonne Paris Nord », UFR SMBH, Labex INFLAMEX, Bobigny,  
12 France

13 <sup>3</sup> URC, APHP, Hôpital Avicenne, Bobigny, France

14 <sup>4</sup> Service d'Hématologie Biologique, APHP, Hôpital Avicenne, Bobigny, France

15 <sup>5</sup> CRC, APHP, Hôpital Avicenne, Bobigny, France

16 These authors contributed equally to this work:

17 <sup>§</sup> Co-second authors and

18 <sup>\*</sup> Co-senior and -corresponding authors, UMR InsermU978 / Université Paris 13 dite  
19 « Sorbonne Paris Nord », UFR SMBH, 74 Rue Marcel Cachin, 93017 Bobigny, France; Emails:

20 [nadine.varin@inserm.fr](mailto:nadine.varin@inserm.fr) and [christine.le-roy@inserm.fr](mailto:christine.le-roy@inserm.fr)

21 Competing Interests statement: none

22 Keywords: IL10, TGFβ1, FOXP3, Regulatory B cells, CLL progression

23 Running title: Immuno-regulatory functions in CLL progression

24

26 **Supplementary information: Methods**

27

28 **Western blotting**

29 CLL B cells purified from individuals and CD4<sup>+</sup> T cells pooled from 10 CLL samples were  
30 lysed in RIPA buffer (25 mM Tris-HCl, pH 7.4, 150 mM NaCl, 1 mM EDTA, 1% NP40, 1%  
31 sodium deoxycholate, 0.1% SDS) supplemented with protease inhibitors (0.2 mM Na<sub>3</sub>VO<sub>4</sub>, 25  
32 mM NaF, 20 µg/ml Aprotinin, 10 µg/ml Leupeptin, 10 µg/ml Pepstatin and 1 mM PMSF).  
33 Negatively selected and sorted B cells, U2OS, as well as MOCK- or FOXP3-transfected  
34 HEK293T cells were lysed in 1% NP-40 lysis buffer (50 mM Tris-HCl pH 7.4, 150 mM NaCl,  
35 1 mM EDTA, 1% NP-40, 10% Glycerol with protease inhibitors). IL10 or TGFβ1 stimulated,  
36 α-IL10, α-IL10 receptor or SB431542 treated CLL B cells were lysed in 2% NP-40 lysis buffer  
37 or with RIPA buffer containing anti-proteases.

38

39 **Flow cytometry**

40 Isolated PBMCs were cultured or not for 2 days, stained for viability (FVS-510, Becton  
41 Dickinson) for 10 min at 4°C according to manufactures' instructions, washed, labelled with  
42 the indicated antibodies in 2% FCS/PBS for 1h at 4°C and washed. Monocytes, B and T cell  
43 subsets were analyzed on FACSCanto II driven by the BD FACSDIVA™ software and data  
44 compiled with the FlowJo™ software (BD Biosciences).

45 Following 3 days of co-culture, cells were labelled with antibodies for 30 min at 4°C, washed  
46 in 2% FCS/PBS, fixed with 2% PFA/PBS for 20 min at 4°C, permeabilized with 0.5% saponin,  
47 1% BSA in PBS for 30 min at room temperature, stained for FOXP3 in permeabilization buffer  
48 for 1h at room temperature and analyzed on the FACSCanto II (BD). A similar protocol was

49 used for IL10 and TGF $\beta$ 1 intracellular staining on 48h-cultured PBMCs and on 72h-anti-  
50 IgM/CD40L stimulated or not B cells.

51 Cytoplasmic TNF $\alpha$  and IFN $\gamma$  in CD4<sup>+</sup> T cells was analyzed after treatment with PIB. Briefly,  
52 after staining with Lifedead V500 (Ebiosciences) for 10 min at 4°C, cells were labelled with  
53 antibodies for 20 min at 4°C, fixed and permeabilized with Cytofix/Cytoperm buffer (BD  
54 Biosciences) following the manufacturer's protocol and then incubated with anti-TNF $\alpha$  and -  
55 IFN $\gamma$  or control isotype for 1h before processing on FACS Canto II (BD).

56 The functional impact of anti-IL10 or TGF $\beta$ RI inhibitor on T cell subsets (IL4 and IFN $\gamma$ ) was  
57 analyzed on PBMCs cultured or not for 2 days, treated with PIB, stained for viability  
58 (FVS440UV BD) before extracellular (20 min at 4°C) and intracellular staining (1h at 4°C)  
59 using the Cytofix/Cytoperm kit (BD Biosciences). Cell subsets were analyzed on a  
60 Symphony<sup>TM</sup> A3 SORP analyzer (Becton Dickinson).

61 Intracellular staining for IL10, TGF $\beta$ 1 and FOXP3 was performed on 48h-cultured PBMCs  
62 (cohort #2) treated with PIB, stained for viability (BD Horizon Fixable Viability Stain 440UV)  
63 for 10 min at 4°C and labelled for 30 min at 4°C with a mix of antibodies diluted in PBS  
64 supplemented with 2% FCS and 10% BD Horizon Brilliant Stain Buffer Plus. Using the FOXP3  
65 Transcription Factor staining buffer set (eBioscience, ThermoFisher Scientific) and according  
66 to manufacturer's protocol, cells were fixed for 45 min at RT, permeabilized for 10 min with  
67 5% Fc Block<sup>TM</sup> (BD) and then incubated with a mix of antibodies targeting both cytokines and  
68 the transcription factor for 45 min or with isotypic controls. Samples were analyzed on the  
69 Symphony<sup>TM</sup> A3 SORP analyzer (Becton Dickinson).

70 For detection of RNA targets, B cells or PBMCs were processed according to the  
71 manufacturer's instructions (PrimeFlow RNA assay, Invitrogen, ThermoFisher Scientific)  
72 using target-specific probe sets. Briefly, cells were treated with PIB, extracellularly labelled  
73 with a mix of antibodies for 30 min at 4°C and intracellularly stained with or without the RNA

74 probes targeting IL10 and TGFβ1. Samples were analyzed on Canto II flow cytometer (BD).  
75 For simultaneous FOXP3 mRNA and protein detection, thawed PBMCs ( $2 \times 10^6$ ) were cultured  
76 for 2 days, treated with PIB, stained for dead cells (BD Horizon Fixable Viability Stain 440UV)  
77 for 10 min at 4°C and extracellularly labelled for 30 min at 4°C with a mix of antibodies diluted  
78 in PBS supplemented with 2% FCS and 10% BD Horizon Brilliant Stain Buffer Plus. Cells  
79 were then fixed, incubated with human BD Fc Block™ for 10 min at 4°C before being  
80 intracellularly stained for FOXP3 or an irrelevant antibody for 45 min at 4°C in 1X PrimeFlow  
81 RNA permeabilization buffer. After a second step of fixation, cells were incubated with an  
82 RNA probe targeting FOXP3 for 2 h at 40°C, the signal was amplified by sequential steps and  
83 CLL B, CD4<sup>+</sup> T and Treg were analyzed on the Symphony™ A3 SORP analyzer before  
84 processing with FlowJo.

85

86

87 **Supplementary Figures and Tables**

88

89 **Supplementary Figure 1: CLL cells undertake a regulatory crosstalk with their immune**  
90 **counterparts**

91 (A) Representative gating strategy for the selection of monocytes (CD14 vs CD16) and of single  
92 viable CLL B (CD5 vs CD19) and T cells (CD8 vs CD4) (UPN 119). (B) Representative  
93 histogram stagger offset of the CD19 MFI among CD4<sup>+</sup> and B cells co-cultures depicting the  
94 various ratios of autologous purified cell types (1<sup>st</sup> peak: CD4<sup>+</sup> T - CD19<sup>-</sup>; and 2<sup>nd</sup> peak: CLL  
95 B - CD19<sup>+</sup>) (UPN 112). (C) Representative dot plots showing the frequencies of TNF- $\alpha$  (top  
96 series) and IFN- $\gamma$  (bottom series) in unstimulated (NS) and stimulated (S) CD4<sup>+</sup> T cells co-  
97 cultured at the indicated ratios with CLL B cells (UPN 112); gates were determined based on  
98 the respective isotype antibodies.

99

100 **Supplementary Figure 2: Specific subsets of CLL B cells express IL10 together with**  
101 **TGF $\beta$ 1.**

102 (A) Representative gating strategy for selection of single and viable CLL B cells (CD5<sup>+</sup> vs  
103 CD19<sup>+</sup>) expressing IL10 or TGF $\beta$ 1; numbers indicate the frequencies of these populations  
104 obtained after flow cytometry analysis and gates were determined based on the respective  
105 negative control staining (UPN 239). (B) Representative histogram overlays of IL10 (red) or  
106 TGF $\beta$ 1 (blue) mRNA expression in CLL B cells from UPN 369 using RNA flow methodology;  
107 the RPL13A probe (green) was used as a positive control. Percentage of IL10- or TGF $\beta$ 1-  
108 mRNA expressing CLL B cells among CD19<sup>+</sup>CD5<sup>+</sup> cells obtained by RNA flow cytometry;  
109 dotted lines link individual patient samples. Quantification of CLL B cells co-expressing IL10  
110 and TGF $\beta$ 1 mRNA (n=5). (C) Representative dot plots of purified unstimulated or CD40L- $\alpha$ -  
111 IgM-stimulated CLL B cells labelled with  $\alpha$ -IL10 or  $\alpha$ -TGF $\beta$ 1 antibody and their respective

112 isotype controls (UPN 258). **(D)** Purified B cells were cultured for 3 days, stimulated with anti-  
113 IgM/CD40L, labelled with the indicated membrane markers and stained for IL10 (top) or  
114 TGFβ1 (bottom). MFI ratio of CD5, 19, 27, 24, 25, 27 and 38 between IL10<sup>+/-</sup> (n=16) and TGF-  
115 β1<sup>+/-</sup> (n=15) cells are graphed (*cf.* Supplementary Table 4). Wilcoxon signed-rank test \* P≤0.05,  
116 \*\* P≤0.01, \*\*\*\* P≤0.0001. **(E)** Frequencies of Granzyme B<sup>+</sup> in CLL or healthy control B cells  
117 were evaluated upon CD40L/anti-IgM or CD40L/IL-21 stimulation as a control by flow  
118 cytometry. Mann Whitney test with \* P≤0.05 and *ns*, not significant.

119

120 **Supplementary Figure 3: CLL B cells are sensitive to TGFβ1 stimulation and secrete**  
121 **BCR-independent cytokines.**

122 **(A)** CLL B cells were treated with (+) or without (-) with exogenous TGFβ1 (5 ng/ml) in the  
123 presence of the indicated concentrations of SB 431542. After two days, total cell lysates were  
124 analyzed by western blot with the indicated antibodies (UPN 334). Quantification of both  
125 phospho-Smad2/3 normalized to Smad2/3 was graphed (n=3). **(B)** Quantities of the indicated  
126 cytokines secreted in the culture supernatant of purified CD5<sup>+</sup>CD19<sup>+</sup> cells, stimulated (+) or  
127 not (-) with anti-IgM/CD40L and analyzed by “multi-ELISA” assay. Wilcoxon matched-paired  
128 signed rank test, *ns*, not significant P>0.05.

129

130 **Supplementary Figure 4: Functional impact of IL10 and TGFβ1 on their immune**  
131 **counterparts.**

132 **A)** Graphs depict viable PBMCs number (left, n=4) or percentage (right, n=6)) upon 2 days-  
133 treatment with increasing concentrations of α-IL10 or SB 431542, respectively. **(B)** CLL B  
134 cells were treated with (+) or without (-) with exogenous IL10 (40 ng/ml) in presence (+) or  
135 absence (-) of inhibitors targeting the soluble cytokine (anti-IL10; 10 μg/ml) or blocking the  
136 binding to its cognate receptor (anti-R-IL10; 2.5 μg/ml). After two days, total cell lysates were

137 hybridized with the indicated antibodies (UPN 358). Quantification of both phospho-Stat3  
138 normalized to Stat3 was graphed (n=6); Wilcoxon test \*  $P= 0.0312$ . (C) Representative gating  
139 strategy used in flow cytometry analysis to target CD4<sup>+</sup>T cells from 48h cultured PBMCs (UPN  
140 196). (D) Graphs showing the percentages of IL10<sup>+</sup> and TGFβ1<sup>+</sup> CLL B cells among PBMC  
141 after treatments or not (-) with anti-IL10- or SB 431542 from 7 CLL samples; Wilcoxon test \*  
142  $P= 0.0469$  and  $P= 0.0156$  respectively). (E) Graph depicting secreted TGFβ1 in supernatants  
143 from untreated (-) or SB 431542-treated CLL B cells (n=7).

144

145 **Supplementary Figure 5: FOXP3 is expressed in CD19<sup>+</sup>CD5<sup>+</sup>CD27<sup>+</sup>CLL B cells.**

146 (A) Cell sorting gating strategy of B cells negatively selected for CD19<sup>+</sup> CD3<sup>-</sup> CD5<sup>+</sup> CD27<sup>+</sup>;  
147 numbers are percentages of cells for each dot plot. Western blot analysis of FOXP3 expression  
148 using the D608R antibody on purified as well as purified and subsequently sorted CLL B cells.  
149 U2OS and HEK293T cells transfected with FOXP3 or Mock expressing vectors were used as  
150 controls. Vertical dashed line separates a cropped membrane split into two parts with the same  
151 exposure time (B) Gating strategy for viable PBMCs subjected to RNA Flow cytometry  
152 approach shown in Figure 5B (UPN 34). (C) Gating strategy for viable CLL B cells stained for  
153 IL10, TGFβ1 and FOXP3 (UPN 265).

154

155 **Supplementary Table 1: Features of CLL patients in the cohort #1 (n=28)**

156

157 **Supplementary Table 2: Features of CLL patients in the cohort #2 (n=23)**

158

159 **Supplementary Table 3: Antibodies and probes used in this study.**

160

161 **Supplementary Table 4: MFI of the CD markers used for Figures 2D and S2D**

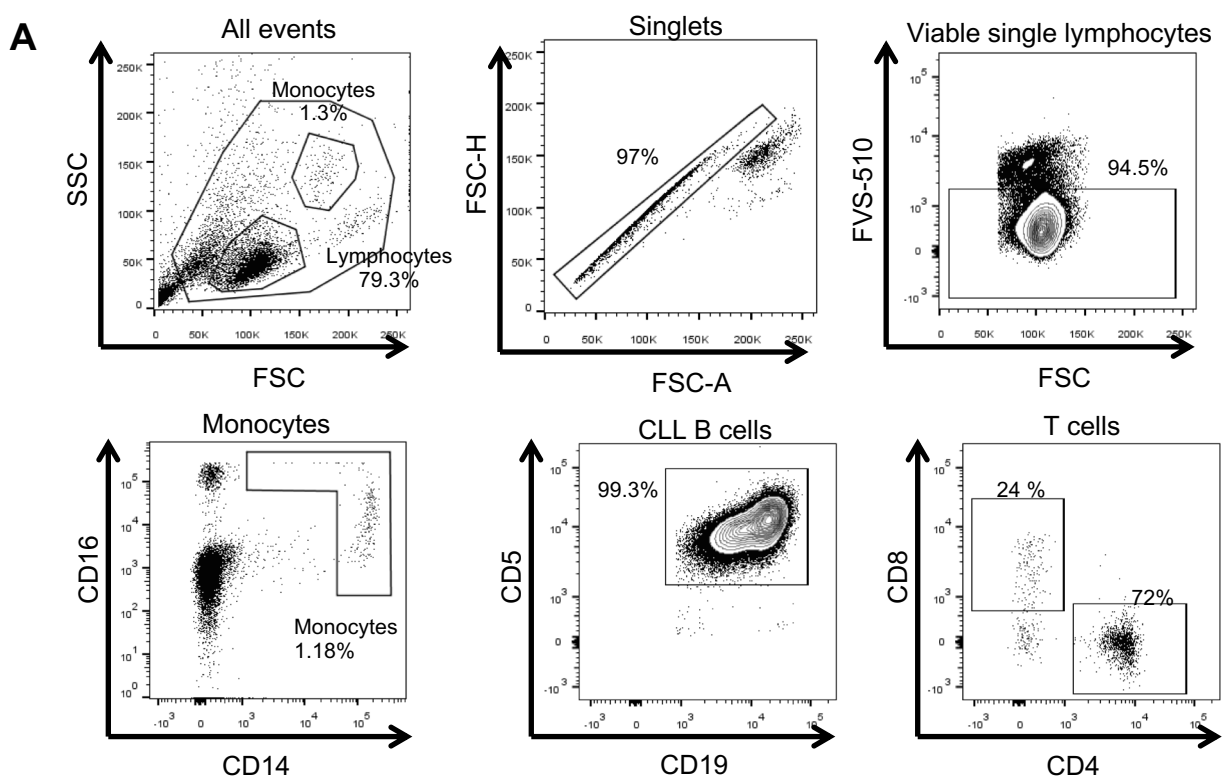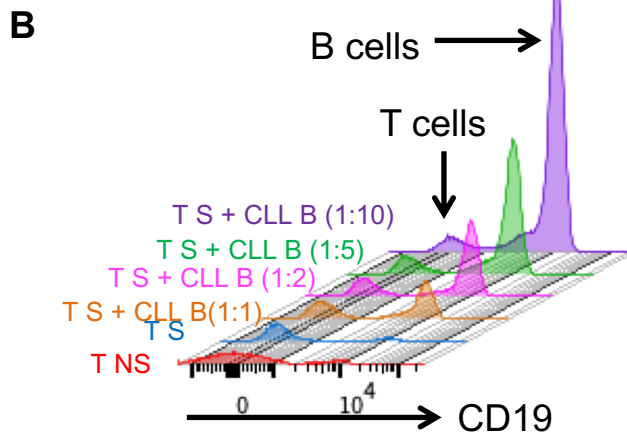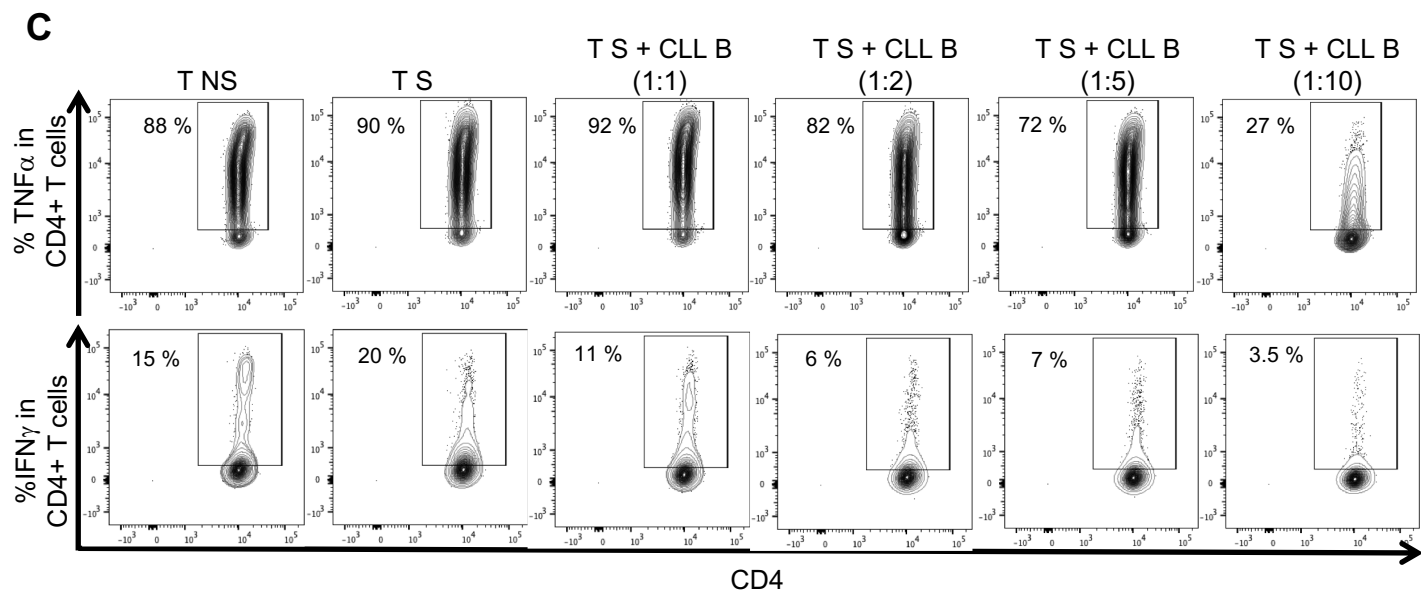

**FIGURE S1**



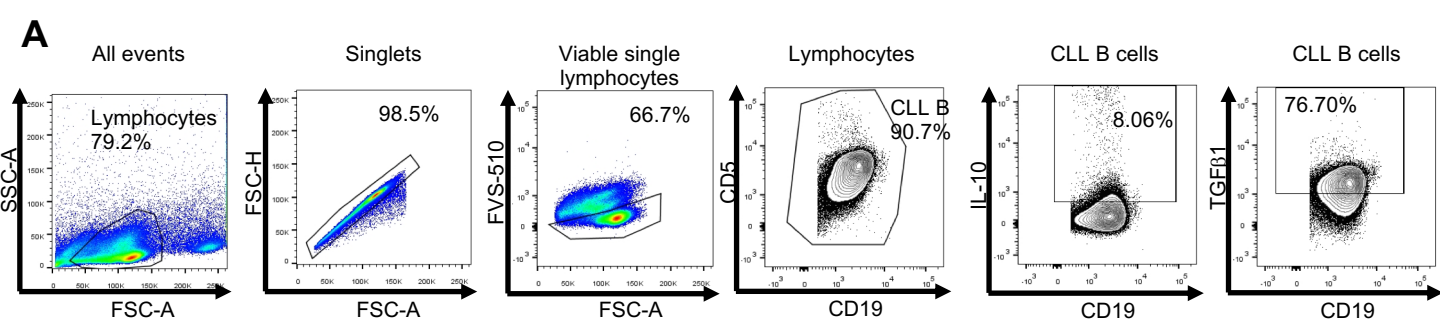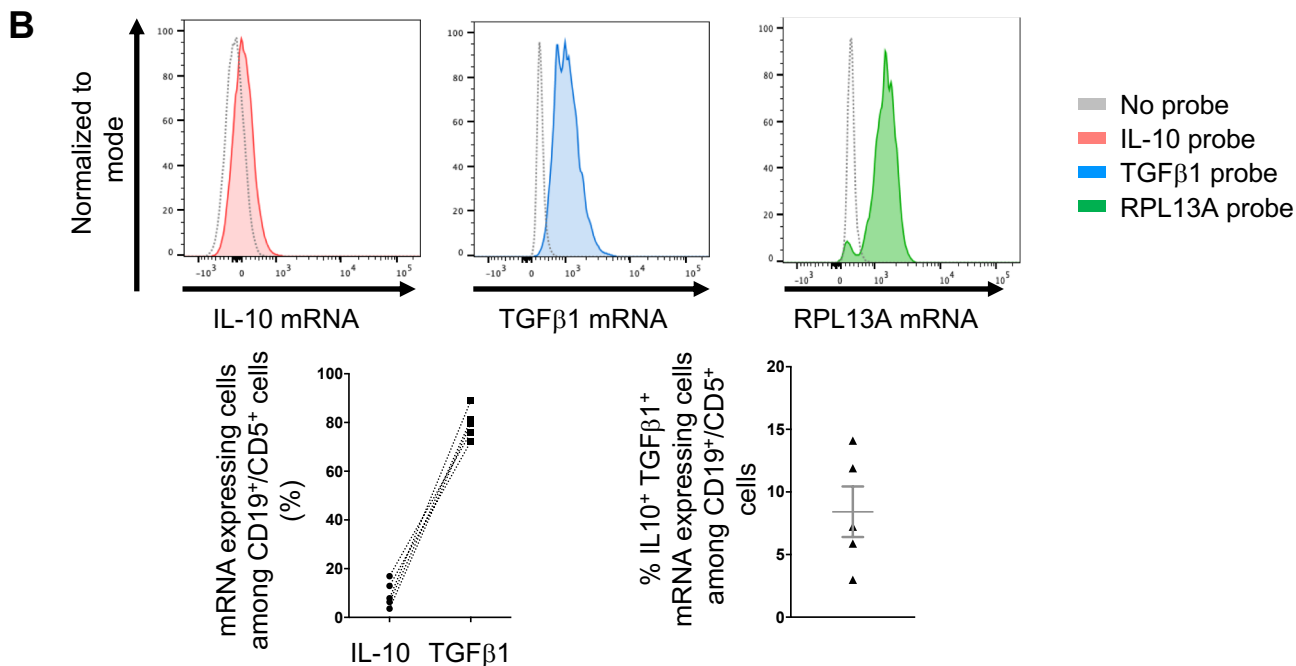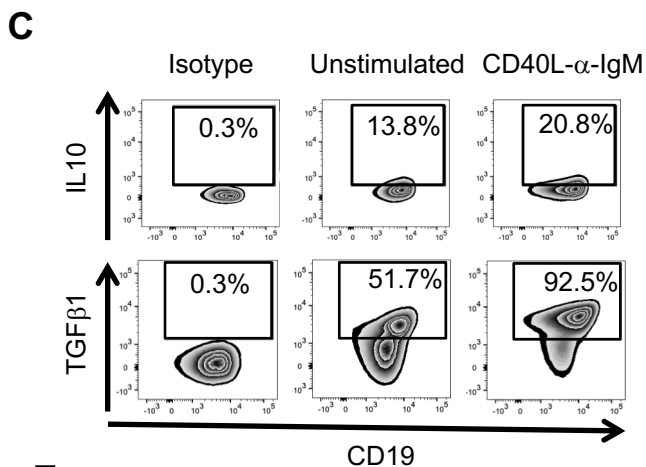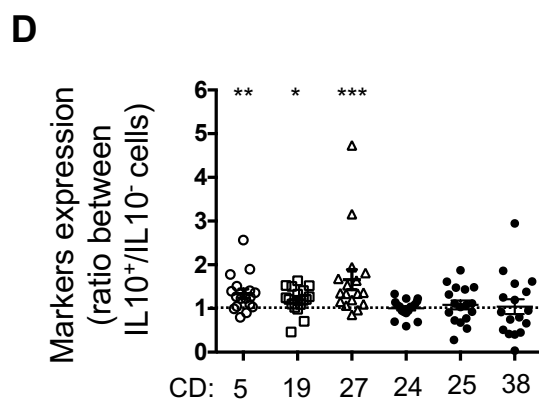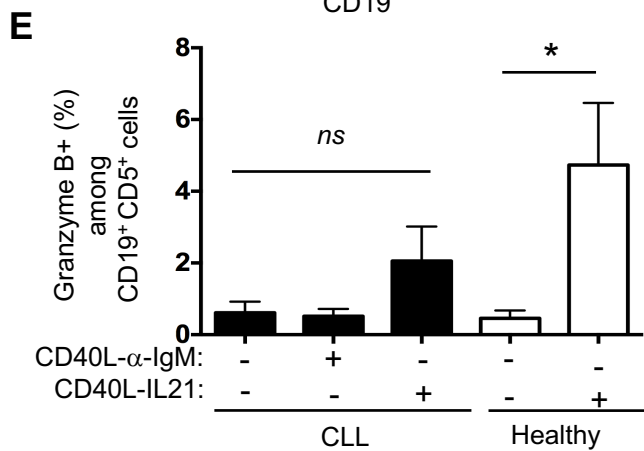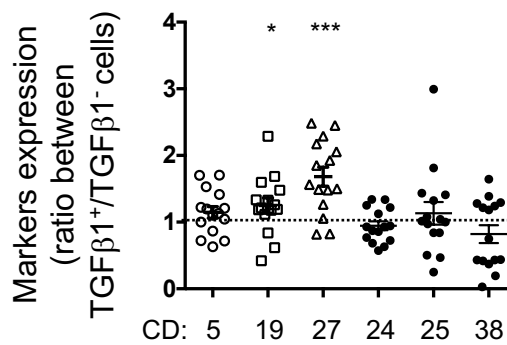

**FIGURE S2**

**A**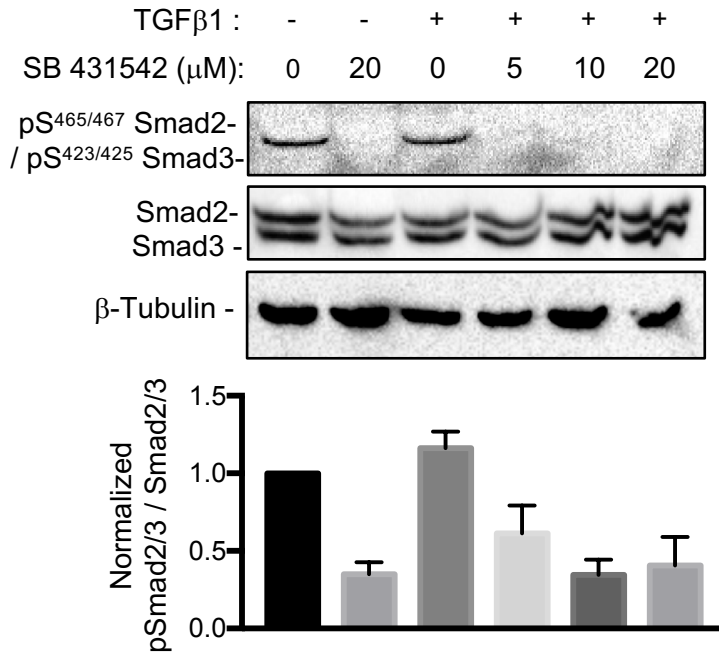**B**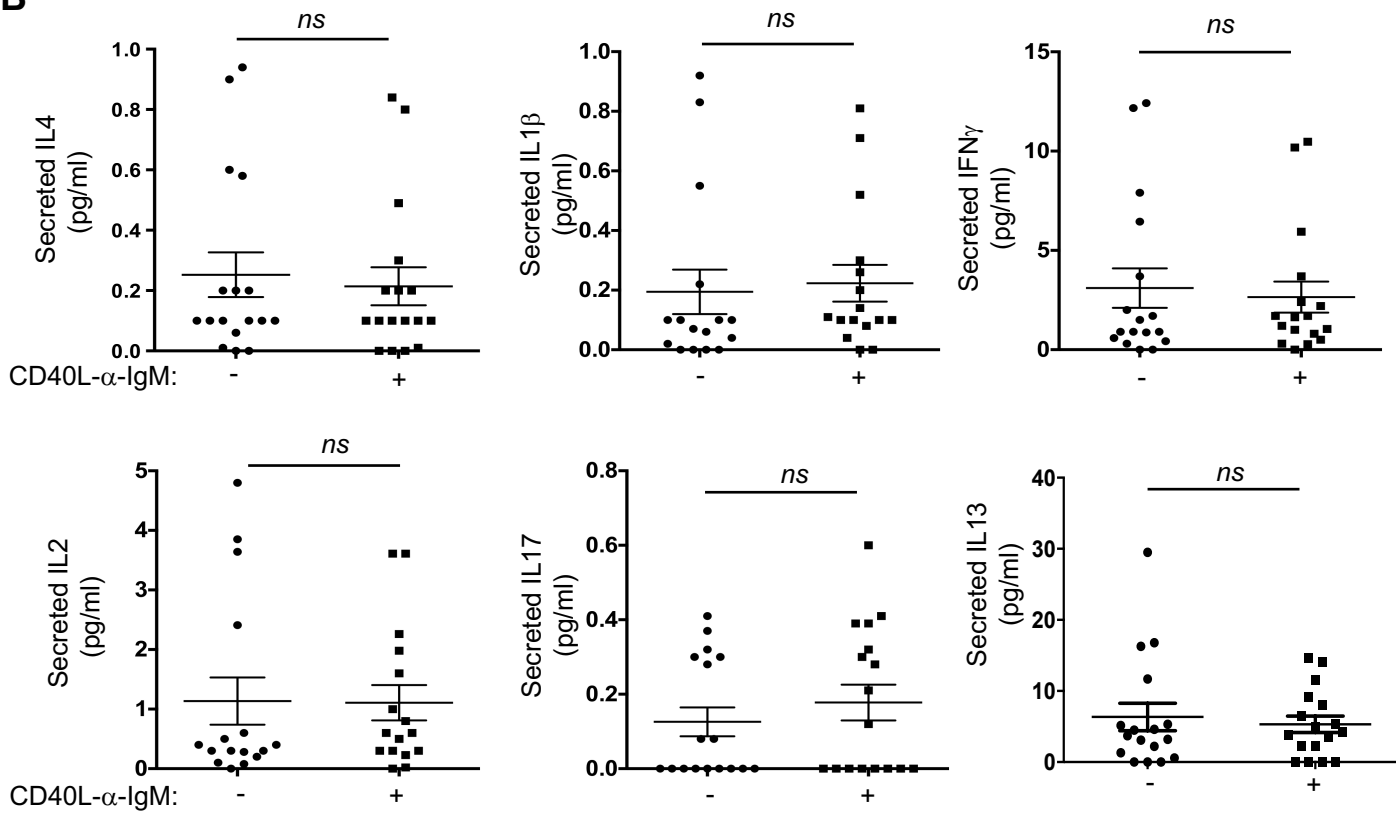**FIGURE S3**

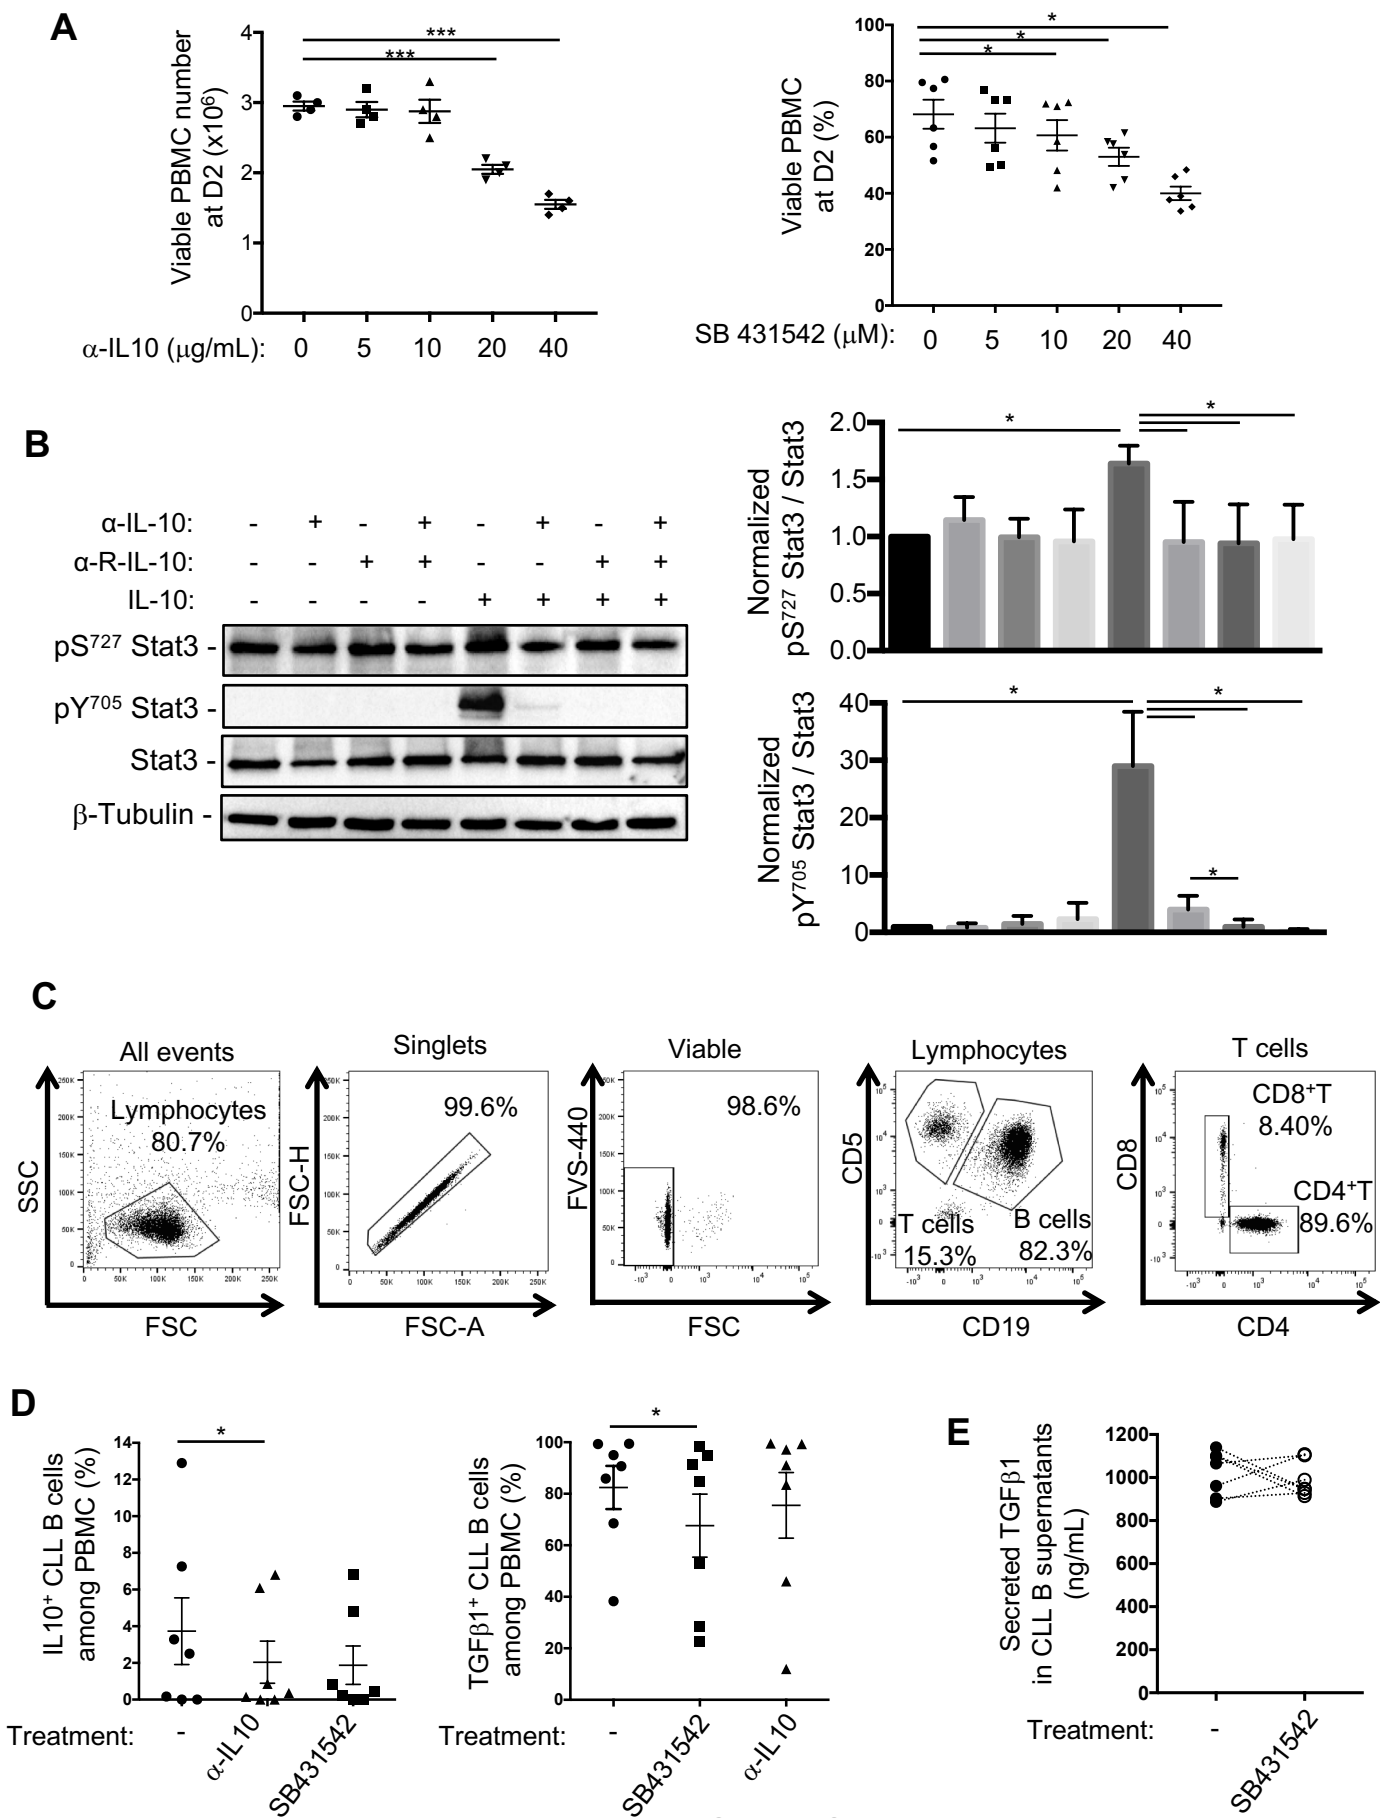

**FIGURE S4**

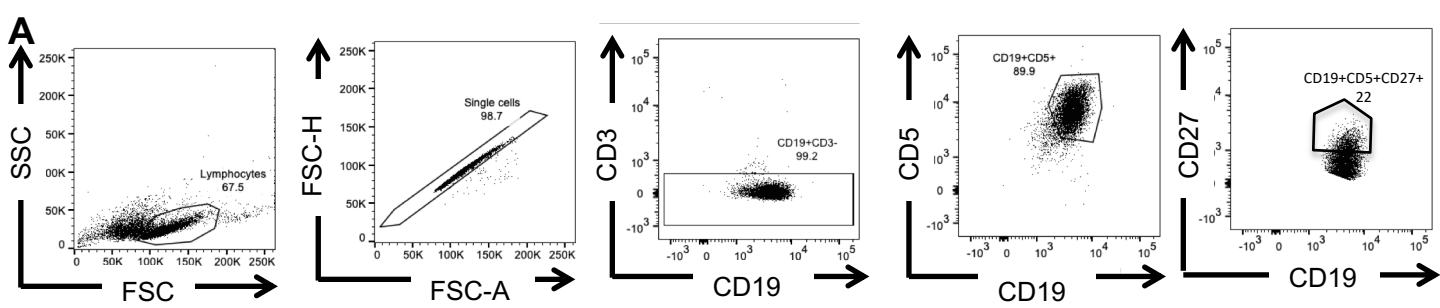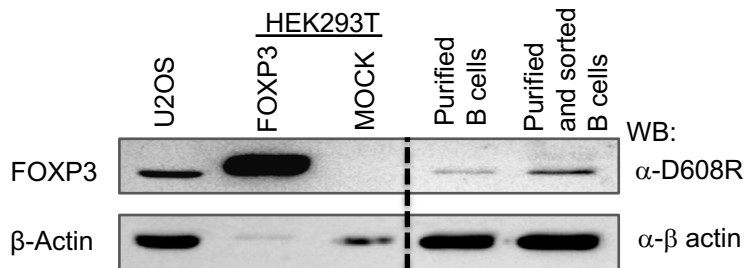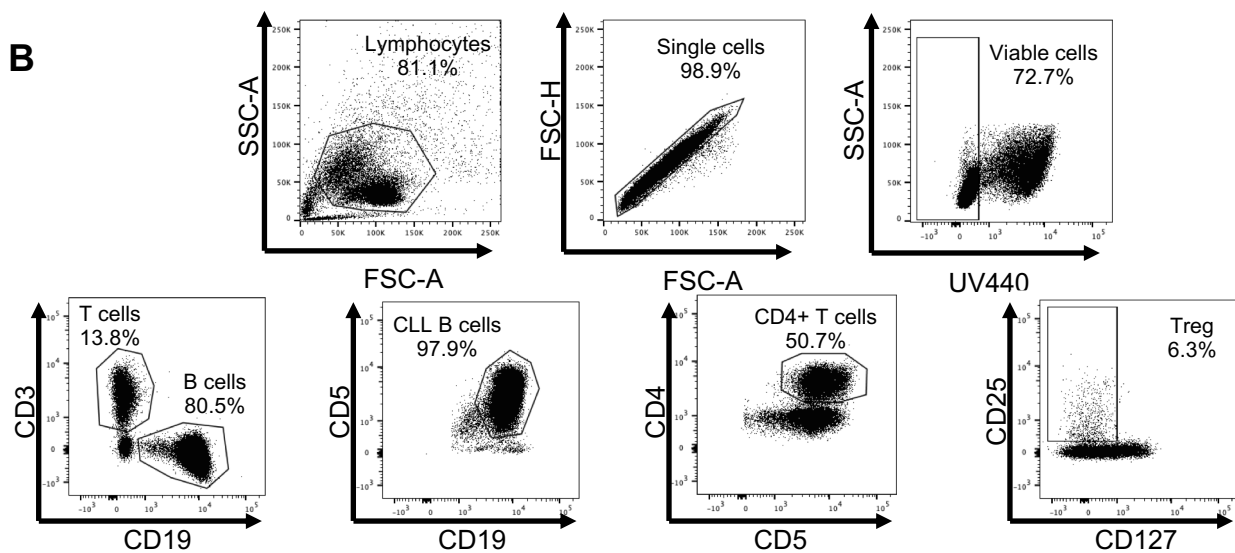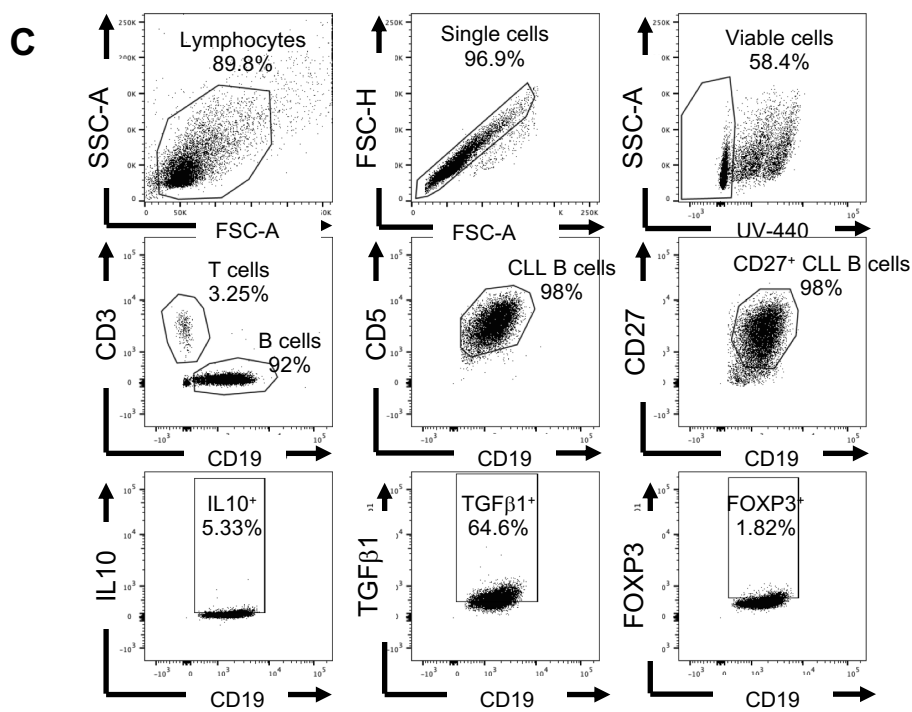

**FIGURE S5**

**Supplementary Table 1: Features of CLL patients in the cohort #1 (n=28)**

| Cluster # | UPN | Age <sup>A</sup> | Sex <sup>B</sup> | Binet stage <sup>C</sup> | IGHV status <sup>D</sup> | Need of treatment <sup>E</sup> |
|-----------|-----|------------------|------------------|--------------------------|--------------------------|--------------------------------|
| 1         | 29  | 56               | M                | A                        | UM                       | 0                              |
|           | 354 | 65               | M                | B                        | UM                       | NA                             |
|           | 232 | 66               | M                | B                        | M                        | 1                              |
|           | 390 | 55               | M                | A                        | UM                       | 0                              |
|           | 286 | 64               | M                | A                        | M                        | 0                              |
|           | 124 | 48               | M                | A                        | M                        | 0                              |
|           | 200 | 55               | M                | A                        | M                        | NA                             |
|           | 47  | 75               | M                | A                        | M                        | 0                              |
|           | 153 | 85               | F                | A                        | M                        | 0                              |
|           | 58  | 71               | F                | A                        | M                        | NA                             |
|           | 307 | 56               | F                | A                        | M                        | 0                              |
|           | 237 | 59               | M                | A                        | ND                       | 0                              |
|           | 424 | 61               | M                | B                        | UM                       | NA                             |
|           | 341 | 45               | M                | C                        | UM                       | 0                              |
|           | 167 | 59               | F                | B                        | UM                       | 0                              |
|           | 323 | 68               | F                | A                        | M                        | 0                              |
|           | 384 | 58               | M                | C                        | UM                       | 1                              |
| 2         | 163 | 63               | M                | A                        | UM                       | 0                              |
|           | 188 | 53               | M                | A                        | M                        | 1                              |
|           | 377 | 78               | F                | A                        | M                        | 0                              |
|           | 365 | 72               | F                | A                        | UM                       | 0                              |
|           | 201 | 49               | M                | C                        | UM                       | 1                              |
|           | 151 | 74               | F                | C                        | UM                       | 1                              |
|           | 126 | 53               | M                | A                        | M                        | NA                             |
|           | 142 | 60               | F                | C                        | UM                       | 1                              |
|           | 164 | 70               | F                | A                        | UM                       | 0                              |
|           | 376 | 48               | M                | C                        | UM                       | 1                              |
|           | 187 | 64               | M                | A                        | M                        | 0                              |

Footnotes

A. Patient's age at the experiment time (year)

B. Female (F) and Male (M)

C. Stage A, B or C at the experiment time

D. Unmutated (UM) or Mutated (M) IGHV status

E. Need of treatment (1) or not (0) prior to the experiment time (more than 2 years)

ND: Not Determined; NA: Not available

Green: patients' cluster #1; Red: patients' cluster #2 (*cf.* Figure 4D)

**Supplementary Table 2: Features of CLL patients in the cohort #2 (n=23)**

| Cluster # | UPN | Age <sup>A</sup> | Sex <sup>B</sup> | Binet stage <sup>C</sup> | IGHV status <sup>D</sup> | Need of treatment <sup>E</sup> |
|-----------|-----|------------------|------------------|--------------------------|--------------------------|--------------------------------|
| 1         | 331 | 76               | F                | A                        | M                        | 0                              |
|           | 310 | 67               | F                | B                        | UM                       | 1                              |
|           | 369 | 62               | F                | A                        | M                        | 0                              |
|           | 239 | 76               | M                | A                        | M                        | 0                              |
|           | 293 | 65               | M                | A                        | M                        | 0                              |
|           | 421 | 80               | M                | A                        | M                        | 0                              |
|           | 297 | 68               | F                | A                        | M                        | 0                              |
|           | 137 | 66               | F                | A                        | M                        | 0                              |
|           | 34  | 92               | F                | A                        | M                        | 0                              |
|           | 412 | 74               | M                | B                        | M                        | 1                              |
|           | 342 | 40               | M                | A                        | UM                       | 0                              |
|           | 42  | 92               | F                | C                        | UM                       | 1                              |
|           | 422 | 57               | M                | A                        | M                        | 0                              |
|           | 119 | 62               | M                | B                        | UM                       | 1                              |
|           | 196 | 85               | M                | B                        | UM                       | 1                              |
| 2         | 152 | 75               | F                | B                        | M                        | 1                              |
|           | 122 | 59               | M                | C                        | UM                       | 1                              |
|           | 358 | 62               | M                | C                        | UM                       | 1                              |
|           | 199 | 42               | M                | C                        | UM                       | 1                              |
|           | 172 | 70               | M                | B                        | UM                       | 1                              |
|           | 20  | 53               | M                | A                        | M                        | 0                              |
|           | 265 | 54               | M                | A                        | UM                       | 0                              |
|           | 95  | 62               | M                | A                        | UM                       | 0                              |

Footnotes

A. Patient's age at the experiment time (year)

B. Female (F) and Male (M)

C. Stage A, B or C at the experiment time

D. Unmutated (UM) or Mutated (M) IGHV status

E. Need of treatment (1) or not (0) after the experiment time

Green: patients' cluster #1; Red: patients' cluster #2 (cf. Figure 5D)

**Supplementary Table 3: Antibodies and probes used in this study.**

| Application                                                                                                | Antibody name                                                   | Clone # | Catalog #   | Fluorochrome | Company                                                       |
|------------------------------------------------------------------------------------------------------------|-----------------------------------------------------------------|---------|-------------|--------------|---------------------------------------------------------------|
| Cell sorting                                                                                               | CD19                                                            | LT19    | 130-113-170 | PE-Vio770    | Miltenyi Biotec, Paris, France                                |
|                                                                                                            | CD3                                                             | REA613  | 130-113-141 | PerCP-Vio700 | Miltenyi Biotec                                               |
|                                                                                                            | CD5                                                             | UCHT2   | 130-119-852 | APC-Vio770   | Miltenyi Biotec                                               |
|                                                                                                            | CD27                                                            | M-T271  | 130-113-633 | VioBlue      | Miltenyi Biotec                                               |
| Western blot                                                                                               | FOXP3                                                           | PCH101  | 14-4776-82  | none         | eBioscience, ThermoFisher Scientific, Les Ulis, France        |
|                                                                                                            | FOXP3                                                           | D608R   | 12632S      | none         | Cell Signaling Technologies, Ozyme, Saint-Cyr-l'Ecole, France |
|                                                                                                            | STAT3                                                           | D3Z2G   | 12640S      | none         | Cell Signaling Technologies                                   |
|                                                                                                            | pSer <sup>727</sup> STAT3                                       | D8C2Z   | 94994S      | none         | Cell Signaling Technologies                                   |
|                                                                                                            | pTyr <sup>705</sup> STAT3                                       | D3A7    | 9145S       | none         | Cell Signaling Technologies                                   |
|                                                                                                            | Smad2/Smad3                                                     | D7G7    | 8685S       | none         | Cell Signaling Technologies                                   |
|                                                                                                            | pSer <sup>465/467</sup> Smad2/<br>pSer <sup>423/425</sup> Smad3 | D27F4   | 8828S       | none         | Cell Signaling Technologies                                   |
|                                                                                                            | GAPDH                                                           | 411     | sc-47724    | none         | Santa Cruz Biotechnology, Heidelberg, Germany                 |
|                                                                                                            | β-actin                                                         | AC-74   | A5316       | none         | Sigma Aldrich, Merck, Darmstadt, Germany                      |
|                                                                                                            | β-tubulin                                                       | AA2     | 05-661-I    | none         | Sigma Aldrich                                                 |
| Flow Cytometry<br><br>Immune cells in isolated PBMCs<br>* 1 <sup>st</sup> panel<br>& 2 <sup>nd</sup> panel | CD3* <sup>&amp;</sup>                                           | UCHT1   | 555332      | FITC         | BD Biosciences, Pont-de-Claix, France                         |
|                                                                                                            | CD4* <sup>&amp;</sup>                                           | RPA-T4  | 560650      | PerCPCy5.5   | BD Biosciences                                                |
|                                                                                                            | CD5*                                                            | UCHT2   | 563516      | APC-Cy7      | BD Biosciences                                                |
|                                                                                                            | CD8 <sup>&amp;</sup>                                            | SK1     | 557834      | APC-Cy7      | BD Biosciences                                                |
|                                                                                                            | CD14*                                                           | MΦP9    | 563743      | BV421        | BD Biosciences                                                |
|                                                                                                            | CD16*                                                           | B73.1   | 561304      | APC          | BD Biosciences                                                |

|                                |                        |            |             |                 |                 |
|--------------------------------|------------------------|------------|-------------|-----------------|-----------------|
|                                | CD19* <sup>&amp;</sup> | SJ25C1     | 557835      | PE-Cy7          | BD Biosciences  |
|                                | CD56*                  | MY31       | 556647      | PE              | BD Biosciences  |
| <b>Flow Cytometry</b>          |                        |            |             |                 |                 |
| B/CD4 <sup>+</sup> T<br>FOXP3  | CD19                   | HIB19      | 561121      | V500            | BD Biosciences  |
|                                | CD5                    | UCHT2      | 555352      | FITC            | BD Biosciences  |
|                                | CD25                   | M-A251     | 557753      | APC-Cy7         | BD Biosciences  |
|                                | CD127                  | HIL-7R-M21 | 560822      | PE-Cy7          | BD Biosciences  |
|                                | FOXP3                  | 259D/C7    | 560046      | PE              | BD Biosciences  |
| <b>Flow Cytometry</b>          |                        |            |             |                 |                 |
| PBMCs<br>IL10/TGFβ1            | CD3                    | UCHT1      | 555332      | FITC            | BD Biosciences  |
|                                | CD5                    | UCHT2      | 563516      | APC-Cy7         | BD Biosciences  |
|                                | CD19                   | SJ25C1     | 557835      | PE-Cy7          | BD Biosciences  |
|                                | IL10                   | JES3-19F1  | 554707      | APC             | BD Biosciences  |
|                                | TGFβ1                  | TW4-9E7    | 562423      | PerCP-Cy5.5     | BD Biosciences  |
| <b>Flow Cytometry</b>          |                        |            |             |                 |                 |
| B cells<br>IL10/TGFβ1          | CD19                   | HIB19      | 561121      | V500            | BD Biosciences  |
|                                | CD5                    | UCHT2      | 561154      | V450            | BD Biosciences  |
|                                | CD24                   | ML5        | 555427      | FITC            | BD Biosciences  |
|                                | CD25                   | M-A251     | 557753      | APC-Cy7         | BD Biosciences  |
|                                | CD27                   | M-T271     | 560612      | PerCPCy5.5      | BD Biosciences  |
|                                | CD38                   | HIT2       | 560677      | PE-Cy7          | BD Biosciences  |
|                                | IL10                   | JES3-19F1  | 554707      | APC             | BD Biosciences  |
|                                | TGFβ1                  | TW4-9E7    | 562339      | PE              | BD Biosciences  |
| <b>Flow Cytometry</b>          |                        |            |             |                 |                 |
| B/CD4 <sup>+</sup> T IFNγ/TNFα | CD19                   | LT19       | 130-113-170 | PEVio770        | Miltenyi Biotec |
|                                | CD3                    | REA613     | 130-113-141 | PerCPVio700     | Miltenyi Biotec |
|                                | CD5                    | UCHT2      | 130-119-852 | APCVio770       | Miltenyi Biotec |
|                                | IFNγ                   | B27        | 559327      | PE              | BD Biosciences  |
|                                | Mouse IgG1,<br>κ       | MOPC-21    | 551436      | PE              | BD Biosciences  |
|                                | TNFα                   | cA2        | 130-120-490 | FITC            | Miltenyi Biotec |
|                                | REA Control<br>IgG1    | REA293     | 130-113-449 | FITC            | Miltenyi Biotec |
| <b>Flow Cytometry</b>          |                        |            |             |                 |                 |
| PBMCs<br>Anti-IL10 or TGFβRI   | CD3                    | SK7        | 557832      | APC-H7          | BD Biosciences  |
|                                | CD4                    | SK3        | 566104      | BV480           | BD Biosciences  |
|                                | CD5                    | L17F12     | 751278      | BUV615          | BD Biosciences  |
|                                | CD8                    | RPA-T8     | 563795      | BUV395          | BD Biosciences  |
|                                | CD19                   | SJ25C1     | 563325      | BV786           | BD Biosciences  |
|                                | CD25                   | M-A251     | 561398      | Alexa Fluor 700 | BD Biosciences  |
|                                | CD127                  | HIL-7R-M21 | 566398      | BB700           | BD Biosciences  |



|                                                |                         |              |                 |                 |                                                        |
|------------------------------------------------|-------------------------|--------------|-----------------|-----------------|--------------------------------------------------------|
|                                                | IFN $\gamma$            | 4S.B3        | 560741          | PE-Cy7          | BD Biosciences                                         |
|                                                | Mouse IgG1 $\kappa$     | MOPC-21      | 557872          | PE-Cy7          | BD Biosciences                                         |
|                                                | IL4                     | 8D4-8        | 560671          | APC             | BD Biosciences                                         |
|                                                | Mouse IgG1 $\kappa$     | MOPC-21      | 554681          | APC             | BD Biosciences                                         |
| <b>Flow Cytometry</b>                          |                         |              |                 |                 |                                                        |
| PBMCs<br>IL10/TGF $\beta$ 1/FOXP3<br>Cohort #2 | CD3                     | SK7          | 741206          | BUV496          | BD Biosciences                                         |
|                                                | CD5                     | L17F12       | 751278          | BUV615          | BD Biosciences                                         |
|                                                | CD25                    | M-A251       | 557741          | PE-Cy7          | BD Biosciences                                         |
|                                                | CD19                    | SJ25C1       | 557791          | APC-Cy7         | BD Biosciences                                         |
|                                                | CD4                     | SK3          | 566104          | BV480           | BD Biosciences                                         |
|                                                | CD27                    | L128         | 612829          | BUV737          | BD Biosciences                                         |
|                                                | CD127                   | HIL-7R-M21   | 563324          | BV786           | BD Biosciences                                         |
|                                                | IL10                    | JES3-19F1    | 554707          | APC             | BD Biosciences                                         |
|                                                | Rat IgG2a $\kappa$      | R35-95       | 551139          | APC             | BD Biosciences                                         |
|                                                | TGF $\beta$ 1           | TW4-9E7      | 562423          | PerCP-Cy5.5     | BD Biosciences                                         |
|                                                | Mouse IgG1 $\kappa$     | MOPC-21      | 550795          | PerCP-Cy5.5     | BD Biosciences                                         |
|                                                | FOXP3                   | PCH101       | 53-4776-42      | Alexa Fluor 488 | eBiosciences                                           |
|                                                | Rat IgG2a $\kappa$      | eBR2a        | 53-4321-80      | Alexa Fluor 488 | eBiosciences                                           |
| <b>Flow Cytometry</b>                          |                         |              |                 |                 |                                                        |
| B cells<br>IL10/TGF $\beta$ 1 mRNA             | CD19                    | SJ25C1       | 557835          | PE-Cy7          | BD Biosciences                                         |
|                                                | CD5                     | UCHT2        | 562646          | BV421           | BD Biosciences                                         |
|                                                | CD3                     | UCHT1        | 561416          | V500            | BD Biosciences                                         |
|                                                | IL10 RNA probe          |              | VA6-13016-PF    | Alexa Fluor 750 | Invitrogen, Thermo Fisher Scientific, Les Ulis, France |
|                                                | TGF $\beta$ 1 RNA probe |              | VA4-18704-PF    | Alexa Fluor 488 | Invitrogen                                             |
| <b>Flow Cytometry</b>                          |                         |              |                 |                 |                                                        |
| PBMCs<br>mRNA/protein FOXP3                    | CD3                     | SK7          | 557832          | APC-Cy7         | BD Biosciences                                         |
|                                                | CD4                     | SK3          | 566910          | PE              | BD Biosciences                                         |
|                                                | CD5                     | L17F12       | 751278          | BUV615          | BD Biosciences                                         |
|                                                | CD19                    | SJ25C1       | 566396          | BB700           | BD Biosciences                                         |
|                                                | CD25                    | M-A251       | 557741          | PE-Cy7          | BD Biosciences                                         |
|                                                | CD27                    | M-T271       | 741833          | BUV737          | BD Biosciences                                         |
|                                                | CD127                   | HIL-7R-M21   | 563324          | BV786           | BD Biosciences                                         |
|                                                | FOXP3                   | PCH101       | 53-4776-42      | Alexa Fluor 488 | eBiosciences                                           |
|                                                | Rat IgG2a $\kappa$      | eBR2a        | 53-4321-80      | Alexa Fluor 488 | eBiosciences                                           |
| FOXP3 RNA probe                                |                         | VA1-15518-PF | Alexa Fluor 647 | Invitrogen      |                                                        |

**Supplementary Table 4: MFI of the CD markers used for Figures 2D and S2D**

| Unstimulated |       |       |       |       |       |       |       |       |       |       |       |       |
|--------------|-------|-------|-------|-------|-------|-------|-------|-------|-------|-------|-------|-------|
| UPN          | CD5   | CD5   | CD19  | CD19  | CD27  | CD27  | CD24  | CD24  | CD25  | CD25  | CD38  | CD38  |
|              | IL10- | IL10+ | IL10- | IL10+ | IL10- | IL10+ | IL10- | IL10+ | IL10- | IL10+ | IL10- | IL10+ |
| 142          | 509   | 1420  | 1020  | 1610  | 456   | 2640  | 938   | 1338  | 189   | 310   | 705   | 840   |
| 365          | 884   | 1950  | 1310  | 2340  | 554   | 1780  | 652   | 570   | 390   | 564   | 447   | 451   |
| 323          | 460   | 605   | 989   | 1180  | 1200  | 2100  | 1188  | 1408  | 144   | 90    | 2250  | 3515  |
| 377          | 726   | 803   | 770   | 851   | 418   | 478   | 652   | 662   | 234   | 238   | 118   | 68    |
| 341          | 309   | 546   | 966   | 1130  | 308   | 398   | 1700  | 1090  | 230   | 244   | 413   | 351   |
| 376          | 312   | 1060  | 1530  | 2810  | 842   | 6020  | 1798  | 1334  | 312   | 454   | 1740  | 4940  |
| 237          | 266   | 533   | 1870  | 1820  | 226   | 828   | 568   | 456   | 1052  | 324   | 2215  | 76    |
| 164          | 779   | 1990  | 905   | 1230  | 438   | 1776  | 1042  | 1566  | 266   | 274   | 735   | 985   |
| 58           | 518   | 1490  | 727   | 1020  | 240   | 654   | 818   | 1088  | 139   | 104   | 247   | 116   |
| 187          | 1780  | 3130  | 1830  | 1980  | 1164  | 2340  | 1782  | 2280  | 380   | 135   | 570   | 209   |
| 126          | ND    | ND    | ND    | ND    | ND    | ND    | ND    | ND    | ND    | ND    | ND    | ND    |
| 201          | 3690  | 6380  | 2170  | 3440  | 2040  | 3240  | 1112  | 942   | 390   | 554   | 416   | 1255  |
| 232          | 1170  | 1260  | 1300  | 1560  | 588   | 778   | 1420  | 1670  | 254   | 426   | 620   | 1135  |
| 390          | 706   | 560   | 1110  | 1150  | 518   | 530   | 1400  | 1226  | 119   | 122   | 555   | 725   |
| 307          | 1980  | 2410  | 2690  | 2530  | 928   | 1232  | 1702  | 1206  | 684   | 660   | 1290  | 1340  |
| 167          | 1410  | 1700  | 1050  | 1380  | 1742  | 2440  | 792   | 1090  | 400   | ND    | ND    | ND    |
| 124          | 1900  | 1620  | 6440  | 2620  | 574   | 564   | 910   | 558   | 2260  | 510   | 6250  | 323   |
| Stimulated   |       |       |       |       |       |       |       |       |       |       |       |       |
| UPN          | CD5   | CD5   | CD19  | CD19  | CD27  | CD27  | CD24  | CD24  | CD25  | CD25  | CD38  | CD38  |
|              | IL10- | IL10+ | IL10- | IL10+ | IL10- | IL10+ | IL10- | IL10+ | IL10- | IL10+ | IL10- | IL10+ |
| 142          | 425   | 597   | 989   | 1230  | 600   | 1894  | 764   | 704   | 139   | 224   | 590   | 540   |
| 365          | 698   | 879   | 1000  | 1270  | 498   | 968   | 640   | 684   | 246   | 274   | 347   | 178   |
| 323          | 384   | 397   | 918   | 1000  | 434   | 476   | 806   | 766   | 176   | 119   | 1715  | 2145  |
| 377          | 553   | 678   | 737   | 755   | 338   | 326   | 644   | 576   | 210   | 195   | 178   | 72    |
| 341          | 260   | 392   | 786   | 1200  | 224   | 406   | 1052  | 624   | 191   | 197   | 409   | 326   |
| 376          | 254   | 482   | 1250  | 1900  | 828   | 1270  | 1032  | 712   | 254   | 364   | 1315  | 2445  |
| 237          | 277   | 275   | 1090  | 1070  | 191   | 220   | 336   | 392   | 324   | 350   | 484   | 320   |
| 164          | 296   | 363   | 1050  | 1580  | 191   | 320   | 330   | 344   | 200   | 264   | 136   | 61    |
| 58           | 530   | 1360  | 528   | 700   | 332   | 1570  | 514   | 684   | 195   | 177   | 365   | 590   |
| 187          | 2420  | 3290  | 1820  | 2200  | 1340  | 1796  | 2200  | 2400  | 202   | 146   | 231   | 173   |
| 126          | ND    | ND    | ND    | ND    | ND    | ND    | ND    | ND    | ND    | ND    | ND    | ND    |
| 201          | 2430  | 4320  | 1920  | 3140  | 1428  | 2340  | 934   | 888   | 314   | 464   | 380   | 1120  |
| 232          | 1010  | 1100  | 901   | 991   | 446   | 602   | 986   | 1124  | 165   | 184   | 328   | 453   |
| 390          | 621   | 560   | 850   | 1010  | 450   | 612   | 1016  | 1056  | 83    | 155   | 453   | 540   |
| 307          | 2030  | 2830  | 3020  | 3650  | 720   | 962   | 1122  | 1164  | 736   | 1092  | 935   | 1465  |
| 167          | 479   | 501   | 1350  | 952   | 386   | 412   | 642   | 788   | 1870  | 1012  | 91    | 87    |
| 124          | 1690  | 1350  | 4600  | 2130  | 578   | 494   | 886   | 618   | 2240  | 630   | 6700  | 238   |

| Unstimulated |        |        |        |        |        |        |        |        |        |        |        |        |
|--------------|--------|--------|--------|--------|--------|--------|--------|--------|--------|--------|--------|--------|
| UPN          | CD5    | CD5    | CD19   | CD19   | CD27   | CD27   | CD24   | CD24   | CD25   | CD25   | CD38   | CD38   |
|              | TGFβ1- | TGFb1+ | TGFβ1- | TGFb1+ | TGFβ1- | TGFb1+ | TGFβ1- | TGFb1+ | TGFβ1- | TGFb1+ | TGFβ1- | TGFb1+ |
| 142          | 836    | 1660   | 1260   | 1770   | 1442   | 3040   | 1168   | 1312   | 242    | 344    | 675    | 985    |
| 365          | 1150   | 1480   | 1460   | 2610   | 730    | 1560   | 612    | 612    | 440    | 552    | 451    | 445    |
| 323          | 473    | 523    | 985    | 1180   | 1040   | 3320   | 1108   | 1754   | 133    | 139    | 2280   | 3275   |
| 377          | 676    | 881    | 759    | 857    | 386    | 566    | 624    | 728    | 197    | 322    | 121    | 66     |
| 341          | 315    | 363    | 911    | 1380   | 284    | 648    | 1602   | 2300   | 234    | 220    | 450    | 245    |
| 376          | 542    | 541    | 1580   | 2270   | 424    | 4200   | 1256   | 1752   | 478    | 366    | 3145   | 2925   |
| 237          | 359    | 365    | 1830   | 1910   | 458    | 492    | 502    | 698    | 372    | 552    | 216    | 675    |
| 164          | 1780   | 2330   | 1140   | 1660   | 1528   | 2260   | 1518   | 1304   | 260    | 364    | 860    | 1540   |
| 58           | 587    | 710    | 792    | 898    | 282    | 378    | 864    | 960    | 131    | 170    | 215    | 292    |
| 187          | 1610   | 3100   | 1840   | 1960   | 914    | 2420   | 1612   | 2380   | 432    | 153    | 645    | 219    |
| 126          | 765    | 1100   | 1960   | 2960   | 690    | 950    | 1556   | 2480   | 432    | 342    | 494    | 108    |
| 201          | 2530   | 4940   | 1560   | 2630   | 1106   | 2780   | 1152   | 1052   | 312    | 460    | 368    | 525    |
| 232          | 1160   | 1410   | 1290   | 1910   | 586    | 1254   | 1416   | 2040   | 254    | 276    | 620    | 710    |
| 390          | 705    | 845    | 1110   | 1590   | 516    | 932    | 1400   | 1744   | 120    | 94     | 555    | 660    |
| 307          | 2030   | 2160   | 2650   | 3570   | 956    | 1352   | 1626   | 1184   | 680    | 638    | 1295   | 1430   |
| 167          | 1350   | 1790   | 1030   | 1230   | 1696   | 2060   | 786    | 834    | 390    | 462    | 51     | 51     |
| 124          | 1860   | 2740   | 6430   | 2620   | 562    | 1002   | 908    | 468    | 2260   | 740    | 6250   | 312    |

| Stimulated |        |        |        |        |        |        |        |        |        |        |        |        |
|------------|--------|--------|--------|--------|--------|--------|--------|--------|--------|--------|--------|--------|
| UPN        | CD5    | CD5    | CD19   | CD19   | CD27   | CD27   | CD24   | CD24   | CD25   | CD25   | CD38   | CD38   |
|            | TGFβ1- | TGFb1+ | TGFβ1- | TGFb1+ | TGFβ1- | TGFb1+ | TGFβ1- | TGFb1+ | TGFβ1- | TGFb1+ | TGFβ1- | TGFb1+ |
| 142        | 500    | 604    | 1070   | 1260   | 908    | 2080   | 742    | 700    | 172    | 228    | 478    | 580    |
| 365        | 677    | 811    | 971    | 1150   | 400    | 822    | 714    | 622    | 254    | 254    | 750    | 146    |
| 323        | 457    | 288    | 1120   | 690    | 462    | 378    | 940    | 594    | 228    | 106    | 2205   | 955    |
| 377        | 639    | 461    | 794    | 665    | 330    | 348    | 646    | 600    | 222    | 187    | 204    | 85     |
| 341        | 262    | 274    | 764    | 1130   | 220    | 344    | 1062   | 770    | 195    | 164    | 436    | 191    |
| 376        | 420    | 364    | 1180   | 1570   | 468    | 1146   | 1158   | 790    | 312    | 304    | 2435   | 1825   |
| 237        | 328    | 371    | 1340   | 1790   | 248    | 372    | 338    | 380    | 234    | 424    | 91     | 113    |
| 164        | 1010   | 1430   | 597    | 752    | 830    | 2060   | 706    | 606    | 178    | 185    | 481    | 615    |
| 58         | ND     | ND     | ND     | ND     | ND     | ND     | ND     | ND     | ND     | ND     | ND     | ND     |
| 187        | 1810   | 3080   | 1820   | 2030   | 946    | 1752   | 1838   | 2460   | 300    | 151    | 383    | 165    |
| 126        | ND     | ND     | ND     | ND     | ND     | ND     | ND     | ND     | ND     | ND     | ND     | ND     |
| 201        | 2040   | 3120   | 1510   | 2410   | 1012   | 1948   | 968    | 898    | 268    | 378    | 329    | 540    |
| 232        | 1010   | 1010   | 899    | 1070   | 444    | 658    | 984    | 1232   | 166    | 168    | 327    | 387    |
| 390        | 620    | 757    | 849    | 1430   | 450    | 978    | 1014   | 1358   | 83     | 89     | 452    | 585    |
| 307        | 2150   | 2370   | 3130   | 3800   | 768    | 972    | 1134   | 872    | 784    | 1124   | 1010   | 1400   |
| 167        | 434    | 740    | 1080   | 2470   | 344    | 512    | 612    | 746    | 1390   | 4160   | 136    | 51     |
| 124        | 1720   | 1230   | 4690   | 1970   | 582    | 480    | 896    | 514    | 2340   | 582    | 7100   | 196    |
